# Supplementary material for: Surface Hygiene Evaluation Method in Food Trucks as an Important Factor in the Assessment of Microbiological Risks in Mobile Gastronomy
Source: MDPI journal article supplement (doi:10.3390/foods12040772), 2023-02-10
Supplement: s1 [file s1]

Table S1. Total Viable Count result on five different surfaces in analysed food truck outlets

| FT   | Refrigerator*                           |                                          | Cutting board*                       |                                          | Knife*                                            |                                         | Serving board*                                |                                          | Working board*                           |                                                |
|------|-----------------------------------------|------------------------------------------|--------------------------------------|------------------------------------------|---------------------------------------------------|-----------------------------------------|-----------------------------------------------|------------------------------------------|------------------------------------------|------------------------------------------------|
|      | Mean P<br>SD                            | Mean R<br>SD                             | Mean P<br>SD                         | Mean R<br>SD                             | Mean P<br>SD                                      | Mean R<br>SD                            | Mean P<br>SD                                  | Mean R<br>SD                             | Mean P<br>SD                             | Mean R<br>SD                                   |
| FT1  | 2.06 <sup>4,6-16,19,20</sup><br>±0.11   | 1.69 <sup>13,14,19</sup><br>±0.27        | 1.96<br>±0.41                        | 0.73 <sup>5,6,10</sup><br>±0.36          | 1.94 <sup>3-20</sup><br>±0.23                     | 2.17 <sup>9,10,13,14,19</sup><br>±0.37  | 2.68 <sup>2</sup><br>±0.45                    | 1.45 <sup>3,4,8-10,14,16</sup><br>±0.21  | 2.62 <sup>15</sup><br>±0.51              | 0.72 <sup>2-5,7,9,10,15,15,18</sup><br>±0.17   |
| FT2  | 1.39 <sup>4,7-12,15,16</sup><br>±0.13   | 1.20 <sup>17</sup><br>±0.50              | 4.74<br>±1.77                        | 1.25 <sup>3,7-9,14,15,17</sup><br>±0.23  | 2.24 <sup>3-6,8-11,13-15,17-19</sup><br>±0.13     | 1.60 <sup>6,8-14,19</sup><br>0.56       | 2.49 <sup>1-20</sup><br>±0.08                 | 5.22 <sup>3,4,8,10,14-16</sup><br>±0.95  | 5.57 <sup>15</sup><br>±0.95              | 1.25 <sup>1,6-9,11-20</sup><br>±0.18           |
| FT3  | 1.01 <sup>4,6-13,15-17</sup><br>±0.15   | 1.50 <sup>10, 16-18, 20</sup><br>±0.03   | 0.95<br>±0.06                        | 1.24 <sup>2,5,6,10</sup><br>±1.08        | 1.2 <sup>1,2,10</sup><br>±0.26                    | 0.60 <sup>10,13,19</sup><br>0.43        | 6.63 <sup>2,5,18</sup><br>±0.66               | 0.15 <sup>1,2,5-9,11-20</sup><br>±0.21   | 5.27 <sup>15</sup><br>±0.40              | 0.92 <sup>1,6-9,11-20</sup><br>±0.11           |
| FT4  | 1.78 <sup>1-5, 17-18</sup><br>±0.14     | nd<br>-                                  | 2.65 <sup>6-10, 12-18</sup><br>±0.35 | 2.66 <sup>5,6,10</sup><br>±0.02          | 0.89 <sup>1,2,10,12,20</sup><br>±0.28             | nd<br>-                                 | 5.39 <sup>2,5</sup><br>±1.17                  | 0.44 <sup>1,2,5-9,11-20</sup><br>±0.23   | 6.72 <sup>15-16</sup><br>±0.55           | 0.48 <sup>1,6-9,11-20</sup><br>±0.51           |
| FT5  | 1.83 <sup>4-16,19,20</sup><br>±0.09     | 1.78 <sup>14,19</sup><br>±0.03           | 6.19 <sup>4</sup><br>±1.39           | 1.49 <sup>1,3,4,7-9,11-20</sup><br>±0.01 | 1.41 <sup>1,2,10</sup><br>±0.15                   | 0.15 <sup>10</sup><br>±0.21             | 2.26 <sup>2-7,9,11,13,15,17,20</sup><br>±0.26 | 2.14 <sup>3,4,8,10,16</sup><br>±0.11     | 6.50 <sup>15</sup><br>±0.40              | 0.60 <sup>1,6-9,11-20</sup><br>±0.42           |
| FT6  | 1.57 <sup>1,3,5,17,18</sup><br>±0.14    | 0.39 <sup>14, 17, 19</sup><br>±0.13      | 5.94 <sup>4</sup><br>±1.48           | 0.30 <sup>1,3,4,7-9,11-20</sup><br>±0.42 | 0.57 <sup>1,2,10,12,20</sup><br>±0.39             | nd<br>-                                 | 1.71 <sup>2,5</sup><br>±0.10                  | 0.48 <sup>3,4,8</sup><br>±0.67           | 1.23 <sup>15</sup><br>±0.16              | 0.74 <sup>2-5,10,19</sup><br>±0.37             |
| FT7  | 1.22 <sup>1-3,5,18,19</sup><br>±0.30    | nd<br>-                                  | 0.88 <sup>4</sup><br>±0.15           | nd<br>-                                  | 1.61 <sup>1,10</sup><br>±0.54                     | 0.68 <sup>10,13,19</sup><br>±0.10       | 1.86 <sup>2,5</sup><br>±0.21                  | 0.39 <sup>3,4,8</sup><br>±0.12           | 0.65 <sup>15</sup><br>±0.28              | 0.63 <sup>1-5,10,16-17,19,20</sup><br>±0.46    |
| FT8  | 0.92 <sup>1-3,5,18,19</sup><br>±0.10    | nd<br>-                                  | 0.74 <sup>4</sup><br>±0.20           | 0.54 <sup>2,5,6,10</sup><br>±0.34        | 0.58 <sup>1,2,10</sup><br>±0.82                   | 0.15 <sup>2,10,16,20</sup><br>±0.21     | 0.40 <sup>2</sup><br>±0.57                    | 1.17 <sup>1-5,10,17-20</sup><br>±0.18    | 1.65 <sup>15-16</sup><br>±0.14           | 0.45 <sup>1-5,10</sup><br>±0.20                |
| FT9  | 1.08 <sup>1-3,5,18,19</sup><br>±0.18    | nd<br>-                                  | nd<br>-                              | 0.30 <sup>2,5,6,10</sup><br>±0.42        | 0.38 <sup>1,2,10,12,20</sup><br>±0.14             | 0.00<br>-                               | 0.83 <sup>2,5</sup><br>±0.10                  | 0.57 <sup>1,3,4,10,20</sup><br>±0.14     | 0.38 <sup>15-16</sup><br>±0.54           | 0.44 <sup>1-5,10,13,16-17,19-20</sup><br>±0.62 |
| FT10 | 4.42 <sup>1-3,5,18,19</sup><br>±0.68    | nd<br>-                                  | 5.80 <sup>4</sup><br>±1.27           | 0.00<br>±0.00                            | 6.25 <sup>1-20</sup><br>±0.92                     | 5.87 <sup>1-20</sup><br>±0.44           | 6.73 <sup>2,5,18</sup><br>±0.40               | 0.00<br>-                                | 6.93 <sup>15-16</sup><br>±0.38           | 0.50 <sup>1,6-20</sup><br>±0.28                |
| FT11 | 2.06 <sup>1-3,5,18,19</sup><br>±0.24    | nd<br>-                                  | 2.54 <sup>4</sup><br>±0.50           | 1.32 <sup>5,6,10</sup><br>±0.06          | 0.75 <sup>1,2,10</sup><br>±0.07                   | 0.50 <sup>2,10,16,20</sup><br>±0.28     | 1.73 <sup>2,5</sup><br>±0.23                  | 0.39 <sup>3,4,10</sup><br>±0.12          | 1.21 <sup>15-16</sup><br>±0.13           | 0.50 <sup>2-5,10,19</sup><br>±0.70             |
| FT12 | 1.67 <sup>1-3,5,18,19</sup><br>±0.31    | nd<br>-                                  | 2.02 <sup>4</sup><br>±0.73           | nd<br>-                                  | 0.74 <sup>1,4, 6,9, 10,13-15,17-19</sup><br>±0.20 | 0.94 <sup>2,10,16,20</sup><br>±0.14     | 1.68 <sup>2</sup><br>±0.27                    | 0.86 <sup>3,4,10</sup><br>±0.12          | 2.05 <sup>15</sup><br>±0.07              | 0.78 <sup>2-5,10,18</sup><br>±0.43             |
| FT13 | 0.88 <sup>1,3,5,18,19</sup><br>±0.14    | 0.63 <sup>1, 17-18,20</sup><br>±0.21     | 1.76 <sup>4</sup><br>±0.19           | 0.64 <sup>5,6,10</sup><br>±0.91          | nd<br>-                                           | nd<br>-                                 | 1.98 <sup>2,5</sup><br>±0.23                  | 0.35 <sup>3,4,10</sup><br>±0.49          | 2.27 <sup>15</sup><br>±0.24              | 1.13 <sup>2-5,9,10,14,18</sup><br>±0.61        |
| FT14 | 0.33 <sup>1,5,18,19</sup><br>±0.47      | 0.70 <sup>1,5,6, 17,18,20</sup><br>±0.00 | 0.45 <sup>4</sup><br>±0.64           | nd<br>-                                  | 0.35 <sup>1,2,10,12,20</sup><br>±0.49             | nd<br>-                                 | 0.64 <sup>2,5</sup><br>±0.48                  | 0.30 <sup>1-4,10,17-20</sup><br>±0.42    | 0.45 <sup>15-16</sup><br>±0.64           | 0.50 <sup>1-5,10,13,16-17,19-20</sup><br>±0.71 |
| FT15 | 1.67 <sup>1-3,5,18,19</sup><br>±0.33    | nd<br>-                                  | 1.69 <sup>4</sup><br>±0.43           | nd<br>-                                  | 1.62 <sup>1,2,10,12,20</sup><br>±0.22             | nd<br>-                                 | 0.66 <sup>2,5</sup><br>±0.17                  | 0.45 <sup>1-4,10,17,19,20</sup><br>±0.64 | 0.92 <sup>1-20</sup><br>±0.22            | 6.57 <sup>1-5,10,16,19-20</sup><br>±0.63       |
| FT16 | 2.14 <sup>1-3,5,18,19</sup><br>±0.28    | nd<br>-                                  | 2.82 <sup>4</sup><br>±0.30           | 0.56 <sup>5,6,10</sup><br>±0.79          | 2.39 <sup>1,10</sup><br>±0.30                     | 0.72 <sup>4,6,8-14,17,19</sup><br>±0.17 | 0.44 <sup>2</sup><br>±0.62                    | 0.69 <sup>1-4,10,17-20</sup><br>±0.13    | 2.88 <sup>4,8-11,14,15,19</sup><br>±0.32 | 2.26 <sup>2-5,7,9,10,14,15,18</sup><br>±0.25   |
| FT17 | 2.92 <sup>2-5,6-16,19,20</sup><br>±0.09 | 2.40 <sup>2,6,13,14,19</sup><br>±0.57    | 1.01 <sup>4</sup><br>±0.16           | 0.23 <sup>2,5,6,10</sup><br>±0.32        | 0.79 <sup>1,2,10,12,20</sup><br>±0.16             | nd<br>-                                 | 2.56 <sup>2,5</sup><br>±0.46                  | 0.40 <sup>3,4,8,10,14-16</sup><br>±0.57  | 2.52 <sup>15</sup><br>±0.36              | 0.70 <sup>2-5,7,9,10,14,18</sup><br>±0.56      |
| FT18 | 2.28 <sup>4-16,19,20</sup><br>±0.40     | 1.90 <sup>3, 13,14,19</sup><br>±0.14     | 2.61 <sup>4</sup><br>±0.23           | 0.33 <sup>5,6,10</sup><br>±0.47          | 1.87 <sup>1,2,10,12,20</sup><br>±0.10             | nd<br>-                                 | 2.45 <sup>2,5,10</sup><br>±0.44               | 1.74 <sup>3,4,8,10,14,16</sup><br>±0.38  | 0.28 <sup>15</sup><br>±0.39              | 0.89 <sup>1-5,10,12,13,16-20</sup><br>±0.16    |
| FT19 | 0.38 <sup>1,5,17,18</sup><br>±0.11      | 0.81 <sup>1,4-6,17,18,20</sup><br>±0.30  | 2.40<br>±0.07                        | 1.34 <sup>5,6,10</sup><br>±0.58          | nd<br>-                                           | nd<br>-                                 | 2.53 <sup>2</sup><br>±0.21                    | 0.65 <sup>3,4,8,10,14-16</sup><br>±0.06  | 3.32 <sup>15,16</sup><br>±0.19           | 0.43 <sup>2-7,9-11,14-15,18</sup><br>±0.18     |
| FT20 | 2.20 <sup>1,5,17,18</sup><br>±0.18      | 0.70 <sup>3,13,14,19</sup><br>±0.14      | 2.53<br>±0.21                        | 1.60 <sup>5,6,10</sup><br>±0.99          | 2.56 <sup>1,4, 6,9, 10,13-15,17-19</sup><br>±0.08 | 0.99 <sup>4,6,8-14,17,19</sup><br>±0.13 | 2.71 <sup>2,5</sup><br>±0.26                  | 0.20 <sup>3,4,8-10,14-16</sup><br>±0.28  | 2.65 <sup>15</sup><br>±0.35              | 1.19 <sup>2-5,7,9-10,14-15,18</sup><br>±0.07   |

statistical differences in column (P<0.05); nd- not detected; P-Petrifim, R- reference method; FT – food truck

Table S2. *Staphylococcus aureus* result on five different surfaces in analysed food truck outlets

| FT   | Refrigerator*                            |                                            | Cutting board*                          |                                      | Knife                                  |               | Serving board*                            |                                         | Working board*                            |                             |
|------|------------------------------------------|--------------------------------------------|-----------------------------------------|--------------------------------------|----------------------------------------|---------------|-------------------------------------------|-----------------------------------------|-------------------------------------------|-----------------------------|
|      | Mean P<br>SD                             | Mean R<br>SD                               | Mean P<br>SD                            | Mean R<br>SD                         | Mean P*<br>SD                          | Mean R<br>SD  | Mean P<br>SD                              | Mean R<br>SD                            | Mean P<br>SD                              | Mean R<br>SD                |
| FT1  | 1.06<br>±0.08                            | nd<br>-                                    | nd<br>-                                 | 0.75 <sup>10</sup><br>±0.64          | nd<br>-                                | 0.15<br>±0.21 | nd<br>-                                   | 0.45 <sup>3,8,12</sup><br>±0.64         | 1.27 <sup>3-5,7-12,14</sup><br>±0.05      | 1.06<br>±0.08               |
| FT2  | Nd<br>-                                  | 0.74 <sup>4,8,12</sup><br>±0.62            | 1.67 <sup>1,4,7,10,13,14</sup><br>±0.10 | 1.15<br>±0.04                        | 1.06 <sup>1,4,6-9,13</sup><br>±0.08    | 1.54<br>±1.32 | 1.06 <sup>1,5,7,8,10-12,14</sup><br>±0.08 | 0.80 <sup>3,8,12</sup><br>±0.28         | 1.55 <sup>3-11,14</sup><br>±0.04          | 0.54<br>±0.34               |
| FT3  | 0.50 <sup>6</sup><br>±0.71               | 0.24 <sup>4,8,12</sup><br>±0.34            | 1.10 <sup>1,7-9,12-14</sup><br>±0.14    | 0.15 <sup>9,10</sup><br>±0.21        | 0.66<br>±0.26                          | 1.31<br>±1.85 | 0.66 <sup>1,5,7,8,11,12,14</sup><br>±0.26 | 2.37 <sup>1-7,9-11,13-15</sup><br>±0.17 | nd<br>-                                   | 0.63<br>±0.21               |
| FT4  | 0.74 <sup>6</sup><br>±0.37               | 1.98 <sup>1-5,7,9-11,13-15</sup><br>±0.04  | 0.81 <sup>1,2,6-9,12-14</sup><br>±0.47  | 0.48 <sup>9,10</sup><br>±0.67        | nd<br>-                                | nd<br>-       | 0.81 <sup>1,5,7,8,11,12,14</sup><br>±0.05 | 0.24 <sup>3,8,12</sup><br>±0.34         | nd<br>-                                   | 0.45<br>±0.21               |
| FT5  | 1.07<br>±0.10                            | 0.89 <sup>4,8,12</sup><br>±0.27            | 1.50 <sup>1,7-9,13,14</sup><br>±0.23    | nd<br>-                              | 0.69<br>±0.12                          | 0.45<br>±0.21 | nd<br>-                                   | 0.65 <sup>3,8,12</sup><br>±0.07         | nd<br>-                                   | 1.57 <sup>13</sup><br>±0.55 |
| FT6  | 2.,11 <sup>2-4,7-10,12-15</sup><br>±0.15 | 1.06 <sup>1,7,8,11,12,13-15</sup><br>±0.03 | 1.59 <sup>1,4,7-9,13-14</sup><br>±0.10  | 0.39 <sup>9,10</sup><br>±0.12        | nd<br>-                                | 0.66<br>±0.26 | 1.10 <sup>1,5,7,8,10-12,14</sup><br>±0.14 | 0.15 <sup>3,8,12</sup><br>±0.21         | 0.80 <sup>2-9,12,14</sup><br>±0.14        | 0.63<br>±0.21               |
| FT7  | nd<br>-                                  | nd<br>-                                    | nd<br>-                                 | 0.60 <sup>9,10</sup><br>±0.43        | nd<br>-                                | 0.45<br>±0.21 | nd<br>-                                   | 0.54 <sup>3,8,12</sup><br>±0.09         | nd<br>-                                   | 0.30<br>±0.43               |
| FT8  | nd<br>-                                  | 2.49 <sup>1-3,5-11,13-15</sup><br>±0.39    | nd<br>-                                 | 0.39 <sup>9,10</sup><br>±0.12        | nd<br>-                                | 0.35<br>±0.49 | nd<br>-                                   | 2.57 <sup>1,2,4-11,13-15</sup><br>±0.15 | nd<br>-                                   | 0.45<br>±0.21               |
| FT9  | nd<br>-                                  | 0.50 <sup>4,8,12</sup><br>±0.28            | nd<br>-                                 | 1.95 <sup>3-8,11-15</sup><br>±0.08   | nd<br>-                                | 0.24<br>±0.34 | 1.09 <sup>1,5,7-12,14</sup><br>±0.12      | 0.50 <sup>3,8,12</sup><br>±0.28         | nd<br>-                                   | 0.45<br>±0.21               |
| FT10 | 0.98 <sup>6</sup><br>±0.03               | 0.15 <sup>4,8,12</sup><br>±0.21            | 0.78 <sup>1,2,7-9,12-14</sup><br>±0.43  | 1.96 <sup>1,3-8,11-15</sup><br>±0.20 | 0.95 <sup>1,4,6-10,13</sup><br>±0.07   | 0.30<br>±0.43 | 0.45 <sup>2,6,9</sup><br>±0.21            | 0.15 <sup>3,8,12</sup><br>±0.21         | 0.59 <sup>1,2,12</sup><br>±0.16           | 0.50<br>±0.28               |
| FT11 | 1.56 <sup>2,7-9,12,14-15</sup><br>±0.17  | nd<br>-                                    | 1.32 <sup>1,7-9,13-14</sup><br>±0.20    | 0.24 <sup>9,10</sup><br>±0.34        | 0.65<br>±0.49                          | 0.50<br>±0.28 | nd<br>-                                   | 0.24 <sup>3,8,12</sup><br>±0.34         | 0.39 <sup>1,2,12,13,15</sup><br>±0.55     | 0.35<br>±0.49               |
| FT12 | nd<br>-                                  | 2.40 <sup>1-3,5-7,9-15</sup><br>±0.18      | 2.04<br>±0.07                           | 0.15 <sup>9,10</sup><br>±0.21        | 0.80 <sup>1,4,6-10,13</sup><br>±0.28   | 0.77<br>±0.10 | nd<br>-                                   | 2.17 <sup>1,2,4-7,9-15</sup><br>±0.08   | 2.13 <sup>1,3-15</sup><br>±0.03           | 0.24<br>±0.34               |
| FT13 | 0.74 <sup>6</sup><br>±0.37               | 0.15 <sup>4,8,12</sup><br>±0.21            | nd<br>-                                 | nd<br>-                              | nd<br>-                                | 0.65<br>±0.07 | 0.80 <sup>1,5,7,8,11,12,14</sup><br>±0.14 | 0.15 <sup>3,8,12</sup><br>±0.21         | 1.07 <sup>3-5,7-9,11-13</sup><br>±0.16    | 0.15 <sup>5</sup><br>±0.21  |
| FT14 | nd<br>-                                  | nd<br>-                                    | nd<br>-                                 | 0.39 <sup>9,10</sup><br>±0.12        | 0.30 <sup>15</sup><br>±0.43            | 0.30<br>±0.43 | nd<br>-                                   | 0.15 <sup>3,8,12</sup><br>±0.21         | 0.00<br>-                                 | 0.39<br>±0.55               |
| FT15 | 0.35 <sup>6,11</sup><br>±0.49            | nd<br>-                                    | 1.09 <sup>1,7-9,12-14</sup><br>±0.07    | nd<br>-                              | 1.42 <sup>1,4,6-9,13,14</sup><br>±0.03 | 0.35<br>±0.49 | 0.63 <sup>1,5,7,8,11,12,14</sup><br>±0.21 | nd<br>-                                 | 1.03 <sup>3-5,7-9,11,12,14</sup><br>±0.11 | 0.30<br>±0.43               |

\* statistical differences in column ( $P < 0.05$ ); nd- not detected; P-Petrifim, R- reference method; FT – food truck
